# Supplementary material for: Dust Criteria Derived from Long-Term Filter and Online Observations at Gosan in South Korea
Source: MDPI journal article supplement (doi:10.3390/atmos12111419), 2021-10-28
Supplement: s1 [file s1]

# Supplementary Materials: Dust Criteria Derived from Long-Term Filter and Online Observations at Gosan in South Korea

Xiaona Shang <sup>1,2</sup>, Meehye Lee <sup>2,\*</sup>, Saehee Lim <sup>2</sup>, Örjan Gustafsson<sup>3</sup>, Gangwoong Lee <sup>4</sup> and Lim-Seok Chang <sup>5</sup>

**Table S1.** The number of samples taken from 2007 to 2012.

| Season             | 2007 | 2008 | 2009 | 2010 | 2011 | 2012 |
|--------------------|------|------|------|------|------|------|
| Spring (Mar.-May)  | NA*  | 16   | 18   | 10   | 7    | NA*  |
| Summer (Jun.-Aug.) | 1    | 3    | 8    | 9    | 4    | NA*  |
| Fall (Sep.-Nov.)   | 9    | 2    | 11   | 8    | 10   | NA*  |
| Winter (Dec.-Feb.) | 2    | 8    | 3    | 10   | 10   | 3    |

\*NA is non-available.

**Table S2.** The list of the event samples accompanied with the date from 2007 to 2012.

| Date (yyyy.mm.dd) | Event         |
|-------------------|---------------|
| 2010.11.12        | Dust          |
| 2011.05.13        | Dust          |
| 2008.03.03        | Dust and rain |
| 2009.12.30        | Dust and snow |
| 2010.03.20        | Dust and haze |
| 2008.01.09        | Haze          |
| 2008.02.20        | Haze          |
| 2009.03.16        | Haze          |
| 2009.04.07        | Haze          |
| 2009.04.08        | Haze          |
| 2009.04.10        | Haze          |
| 2009.11.26        | Haze          |
| 2011.02.07        | Haze          |
| 2011.10.06        | Haze          |
| 2012.01.09        | Haze          |

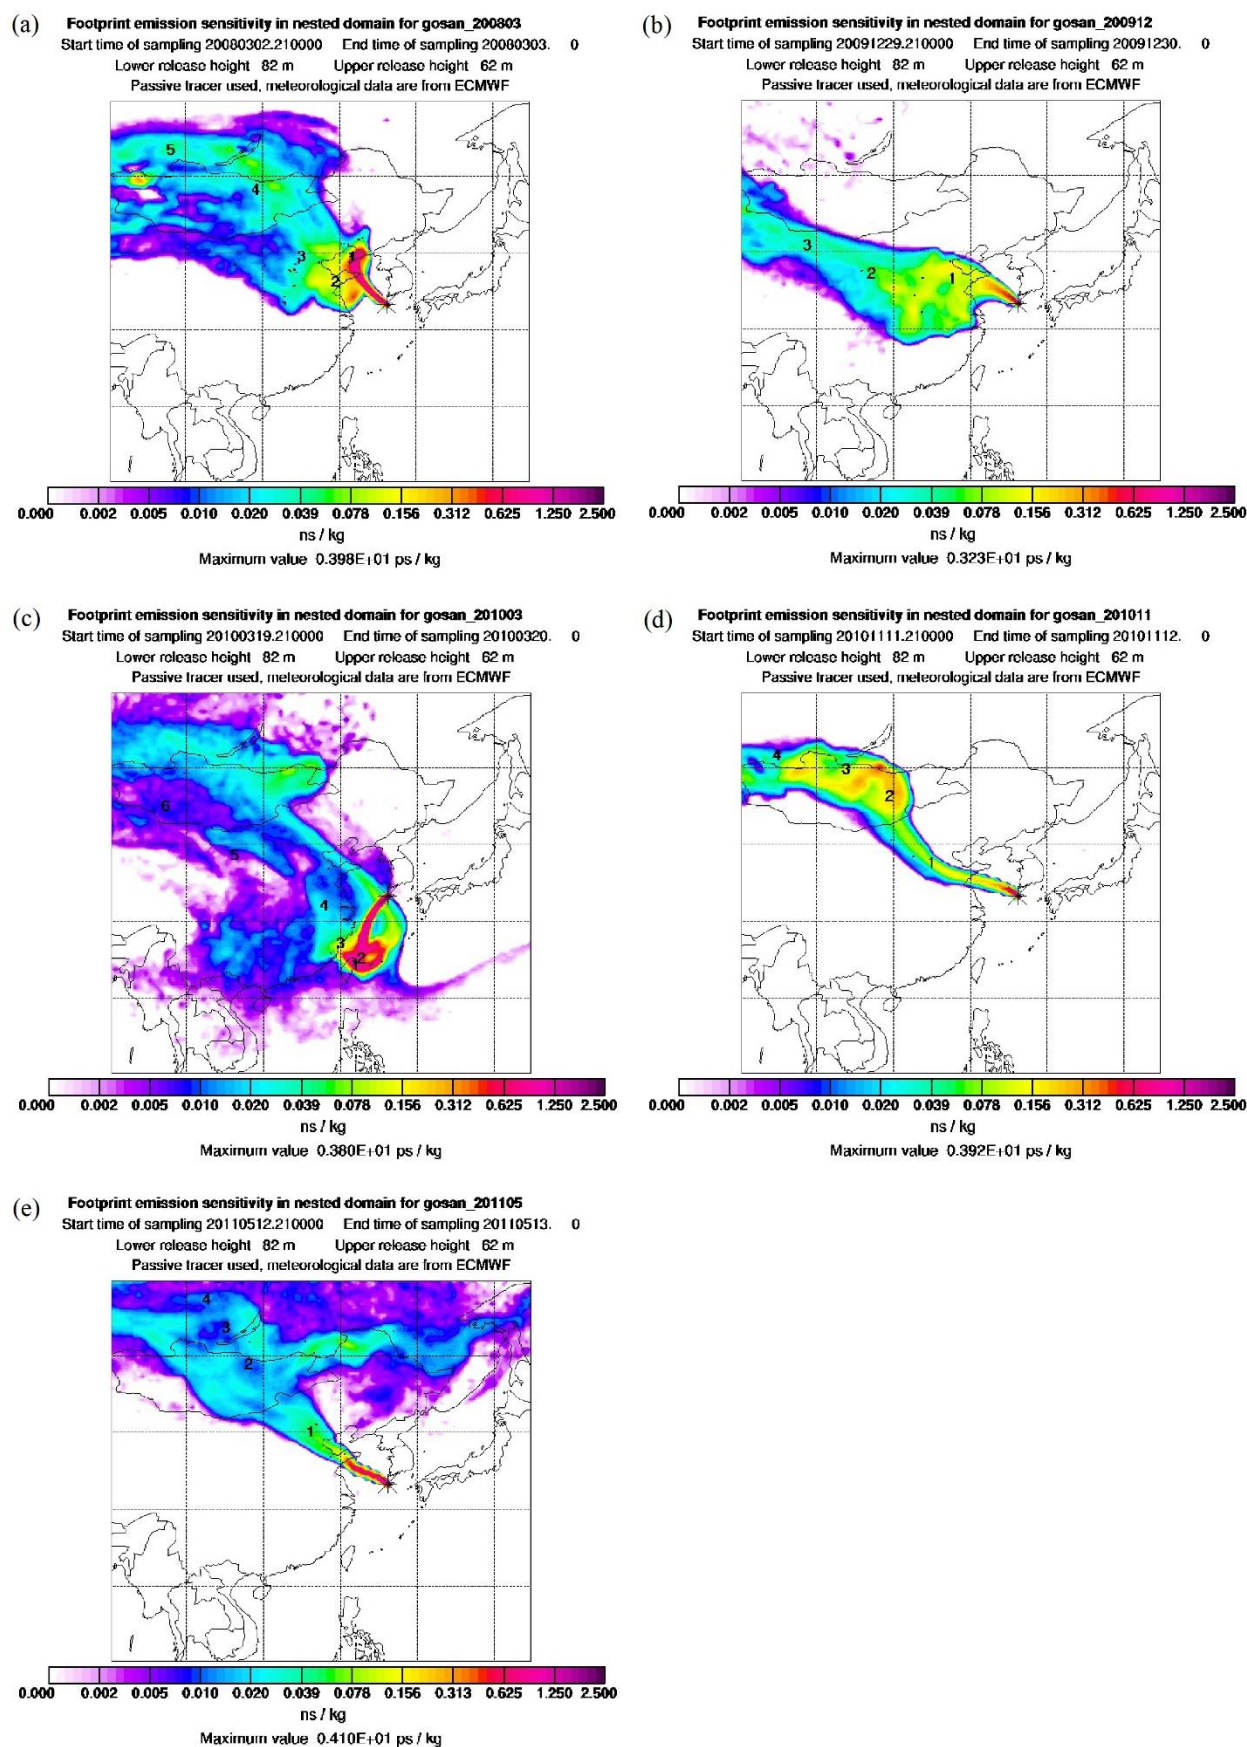

**Figure S1.** The five air mass trajectories that represent the influence of dust areas, and their dates correspond to Table S2. The Lagrangian particle dispersion model FLEXPART

(<http://zardoz.nilu.no/~andreas/STATIONS/GOSAN/index.html>, accessed on 25 October) is used to calculate the backward trajectory every 3 hours.

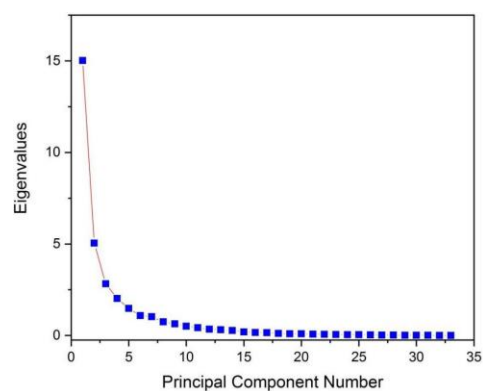

**Figure S2.** Eigenvalues according to the number of principal components.

**Table S3.** The matrix of correlations for each size of particles.

| PM <sub>1</sub>               | Cl <sup>−</sup> | NO <sub>3</sub> <sup>−</sup> | SO <sub>4</sub> <sup>2−</sup> | Na <sup>+</sup> | NH <sub>4</sub> <sup>+</sup> | K <sup>+</sup> | Mg <sup>2+</sup> | Ca <sup>2+</sup> | OC    | EC    | mass |
|-------------------------------|-----------------|------------------------------|-------------------------------|-----------------|------------------------------|----------------|------------------|------------------|-------|-------|------|
| Cl <sup>−</sup>               | 1.00            | 0.00                         | −0.04                         | 0.91            | −0.05                        | −0.02          | 0.34             | −0.06            | −0.03 | −0.04 | 0.05 |
| NO <sub>3</sub> <sup>−</sup>  | 0.00            | 1.00                         | 0.74                          | 0.00            | 0.48                         | 0.68           | 0.00             | 0.08             | 0.45  | 0.56  | 0.80 |
| SO <sub>4</sub> <sup>2−</sup> | −0.04           | 0.74                         | 1.00                          | 0.00            | 0.64                         | 0.80           | 0.09             | 0.10             | 0.53  | 0.70  | 0.90 |
| Na <sup>+</sup>               | 0.91            | 0.00                         | 0.00                          | 1.00            | 0.05                         | 0.01           | 0.42             | 0.05             | 0.00  | −0.02 | 0.11 |
| NH <sub>4</sub> <sup>+</sup>  | −0.05           | 0.48                         | 0.64                          | 0.05            | 1.00                         | 0.37           | −0.15            | 0.38             | 0.39  | 0.59  | 0.66 |
| K <sup>+</sup>                | −0.02           | 0.68                         | 0.80                          | 0.01            | 0.37                         | 1.00           | 0.25             | −0.01            | 0.61  | 0.71  | 0.76 |
| Mg <sup>2+</sup>              | 0.34            | 0.00                         | 0.09                          | 0.42            | −0.15                        | 0.25           | 1.00             | −0.13            | 0.24  | 0.16  | 0.06 |
| Ca <sup>2+</sup>              | −0.06           | 0.08                         | 0.10                          | 0.05            | 0.38                         | −0.01          | −0.13            | 1.00             | 0.04  | 0.06  | 0.22 |
| OC                            | −0.03           | 0.45                         | 0.53                          | 0.00            | 0.39                         | 0.61           | 0.24             | 0.04             | 1.00  | 0.88  | 0.51 |
| EC                            | −0.04           | 0.56                         | 0.70                          | −0.02           | 0.59                         | 0.71           | 0.16             | 0.06             | 0.88  | 1.00  | 0.65 |
| mass                          | 0.05            | 0.80                         | 0.90                          | 0.11            | 0.66                         | 0.76           | 0.06             | 0.22             | 0.51  | 0.65  | 1.00 |
| PM <sub>2.5</sub>             | Cl <sup>−</sup> | NO <sub>3</sub> <sup>−</sup> | SO <sub>4</sub> <sup>2−</sup> | Na <sup>+</sup> | NH <sub>4</sub> <sup>+</sup> | K <sup>+</sup> | Mg <sup>2+</sup> | Ca <sup>2+</sup> | OC    | EC    | mass |
| Cl <sup>−</sup>               | 1.00            | 0.34                         | 0.11                          | 0.57            | −0.02                        | 0.00           | 0.47             | 0.30             | 0.19  | −0.04 | 0.21 |
| NO <sub>3</sub> <sup>−</sup>  | 0.34            | 1.00                         | 0.60                          | 0.12            | 0.46                         | 0.56           | 0.34             | 0.23             | 0.68  | 0.64  | 0.61 |
| SO <sub>4</sub> <sup>2−</sup> | 0.11            | 0.60                         | 1.00                          | 0.06            | 0.53                         | 0.66           | 0.34             | 0.14             | 0.60  | 0.66  | 0.66 |
| Na <sup>+</sup>               | 0.57            | 0.12                         | 0.06                          | 1.00            | 0.12                         | −0.05          | 0.35             | 0.35             | 0.07  | −0.11 | 0.18 |
| NH <sub>4</sub> <sup>+</sup>  | −0.02           | 0.46                         | 0.53                          | 0.12            | 1.00                         | 0.38           | −0.09            | 0.25             | 0.48  | 0.60  | 0.72 |
| K <sup>+</sup>                | 0.00            | 0.56                         | 0.66                          | −0.05           | 0.38                         | 1.00           | 0.44             | 0.25             | 0.77  | 0.83  | 0.64 |
| Mg <sup>2+</sup>              | 0.47            | 0.34                         | 0.34                          | 0.35            | −0.09                        | 0.44           | 1.00             | 0.45             | 0.43  | 0.22  | 0.32 |
| Ca <sup>2+</sup>              | 0.30            | 0.23                         | 0.14                          | 0.35            | 0.25                         | 0.25           | 0.45             | 1.00             | 0.43  | 0.27  | 0.52 |
| OC                            | 0.19            | 0.68                         | 0.60                          | 0.07            | 0.48                         | 0.77           | 0.43             | 0.43             | 1.00  | 0.88  | 0.74 |
| EC                            | −0.04           | 0.64                         | 0.66                          | −0.11           | 0.60                         | 0.83           | 0.22             | 0.27             | 0.88  | 1.00  | 0.76 |
| mass                          | 0.21            | 0.61                         | 0.66                          | 0.18            | 0.72                         | 0.64           | 0.32             | 0.52             | 0.74  | 0.76  | 1.00 |
| PM <sub>10</sub>              | Cl <sup>−</sup> | NO <sub>3</sub> <sup>−</sup> | SO <sub>4</sub> <sup>2−</sup> | Na <sup>+</sup> | NH <sub>4</sub> <sup>+</sup> | K <sup>+</sup> | Mg <sup>2+</sup> | Ca <sup>2+</sup> | OC    | EC    | mass |
| Cl <sup>−</sup>               | 1.00            | 0.18                         | −0.07                         | 0.74            | −0.16                        | −0.03          | 0.58             | 0.32             | 0.16  | −0.19 | 0.27 |
| NO <sub>3</sub> <sup>−</sup>  | 0.18            | 1.00                         | 0.68                          | 0.17            | 0.68                         | 0.66           | 0.37             | 0.53             | 0.68  | 0.67  | 0.70 |
| SO <sub>4</sub> <sup>2−</sup> | −0.07           | 0.68                         | 1.00                          | 0.03            | 0.80                         | 0.80           | 0.23             | 0.38             | 0.67  | 0.81  | 0.67 |
| Na <sup>+</sup>               | 0.74            | 0.17                         | 0.03                          | 1.00            | 0.02                         | −0.03          | 0.51             | 0.38             | 0.13  | −0.15 | 0.34 |
| NH <sub>4</sub> <sup>+</sup>  | −0.16           | 0.68                         | 0.80                          | 0.02            | 1.00                         | 0.53           | −0.11            | 0.30             | 0.46  | 0.69  | 0.59 |
| K <sup>+</sup>                | −0.03           | 0.66                         | 0.80                          | −0.03           | 0.53                         | 1.00           | 0.43             | 0.36             | 0.75  | 0.86  | 0.55 |
| Mg <sup>2+</sup>              | 0.58            | 0.37                         | 0.23                          | 0.51            | −0.11                        | 0.43           | 1.00             | 0.49             | 0.45  | 0.13  | 0.41 |
| Ca <sup>2+</sup>              | 0.32            | 0.53                         | 0.38                          | 0.38            | 0.30                         | 0.36           | 0.49             | 1.00             | 0.51  | 0.27  | 0.81 |
| OC                            | 0.16            | 0.68                         | 0.67                          | 0.13            | 0.46                         | 0.75           | 0.45             | 0.51             | 1.00  | 0.79  | 0.67 |
| EC                            | −0.19           | 0.67                         | 0.81                          | −0.15           | 0.69                         | 0.86           | 0.13             | 0.27             | 0.79  | 1.00  | 0.49 |
| mass                          | 0.27            | 0.70                         | 0.67                          | 0.34            | 0.59                         | 0.55           | 0.41             | 0.81             | 0.67  | 0.49  | 1.00 |
